# Supplementary material
Source: publisher figshare collection journal article supplement (https://sage.figshare.com/ndownloader/files/12404582)
Supplement: Supplementary file 1 [file 12404582]

**Appendix 1.** List of the 18 selected journals and their 2014 impact factor\*.

General medicine:

New England Journal of Medicine (55.873)  
LANCET (45.217)  
Journal of American Medical Association (35.289)  
Annals of Internal Medicine (17.81)  
British Medical Journal (17.445)  
Canadian Medical Association Journal (5.959)

Critical care medicine:

American Journal of Respiratory and Critical Care Medicine (12.996)  
Intensive Care Medicine (7.214)  
Critical Care Medicine (6.312)  
Critical Care (4.476)  
Journal of Trauma (Journal of Trauma and Acute Care Surgery since  
January 2012) (2.736)  
Journal of Critical Care (1.995)

Neurology, neurosurgery and neuroICU:

Lancet Neurology (21.896)  
Neurology (8.286)  
Journal of Neurology, Neurosurgery and Psychiatry (6.807)  
Journal of Neurotrauma (3.714)

Neurosurgery (3.62)

Neurocritical Care (2.44)

\* Retrieved from ISI Web of Knowledge, Journal Citation Reports, Thomson  
Reuters, London, United Kingdom.
